# Supplementary material
Source: PubMed Central journal article supplement (PMC5815023)
Supplement: jamacardiol-2-617-s001.pdf [file jamacardiol-2-617-s001.pdf]

## Supplementary Online Content

Rautiainen S, Gaziano JM, Christen WG, et al. Effect of baseline nutritional status on long-term multivitamin use and cardiovascular disease risk: a secondary analysis of the Physicians' Health Study II randomized clinical trial. *JAMA Cardiol*. Published online April 5, 2017.  
doi:10.1001/jamacardio.2017.0176

**eTable.** Vitamins and Minerals Contained in the Centrum Silver Formulation Used in the Physicians' Health Study II Trial

**eTable.** Vitamins and Minerals Contained in the Centrum Silver Formulation Used in the Physicians' Health Study II Trial

| <b>Vitamin or Mineral</b> | <b>Amount</b>     |
|---------------------------|-------------------|
| Vitamin A (IU)            | 5000 <sup>a</sup> |
| Vitamin C (mg)            | 60                |
| Vitamin D (IU)            | 400               |
| Vitamin E (IU)            | 45                |
| Vitamin K (µg)            | 10                |
| Thiamin (mg)              | 1.5               |
| Riboflavin (mg)           | 1.7               |
| Niacin (mg)               | 20                |
| Vitamin B6 (mg)           | 3                 |
| Folic acid (µg)           | 400               |
| Vitamin B12 (µg)          | 25                |
| Biotin (µg)               | 30                |
| Pantothenic acid (mg)     | 10                |
| Calcium (mg)              | 200               |
| Iron (mg)                 | 4                 |
| Phosphorus (mg)           | 48                |
| Iodine (µg)               | 150               |
| Magnesium (mg)            | 100               |
| Zinc (mg)                 | 15                |
| Selenium (µg)             | 20                |
| Copper (mg)               | 2                 |
| Manganese (mg)            | 3.5               |
| Chromium (µg)             | 130               |
| Molybdenum (µg)           | 160               |
| Chloride (mg)             | 72.6              |
| Potassium (mg)            | 80                |
| Boron (µg)                | 150               |
| Nickel (µg)               | 5                 |
| Vanadium (µg)             | 10                |
| Silicon (mg)              | 2                 |

<sup>a</sup> 50% as beta-carotene
